# Supplementary material for: A practical method for the simultaneous quantitative determination of twelve anthraquinone derivatives in rhubarb by a single-marker based on ultra-performance liquid chromatography and chemometric analysis
Source: Royal Society of Chemistry journal article supplement (doi:10.1039/c5ay03299g), 2016-01-01
Supplement: c5ay03299g1.pdf [file c5ay03299g1.pdf]

**Table 1** Precision test of the UPLC analysis

| Components                             | intra-day runs (mean $\pm$ SD, n=6) |                      | inter-day runs (mean $\pm$ SD, n=6) |         |
|----------------------------------------|-------------------------------------|----------------------|-------------------------------------|---------|
|                                        | Content (mg/g)                      | RSD <sup>a</sup> (%) | Content (mg/g)                      | RSD (%) |
| Aloe-emodin-8-O- $\beta$ -D-glucoside  | 4.422 $\pm$ 0.013                   | 2.41                 | 4.397 $\pm$ 0.044                   | 1.78    |
| Sennoside B                            | 1.265 $\pm$ 0.053                   | 4.77                 | 1.231 $\pm$ 0.072                   | 3.98    |
| Rhein-8-O- $\beta$ -D-glucoside        | 5.136 $\pm$ 0.067                   | 1.25                 | 5.101 $\pm$ 0.072                   | 1.03    |
| Sennoside A                            | 3.243 $\pm$ 0.039                   | 4.52                 | 3.201 $\pm$ 0.054                   | 4.07    |
| Chrysophanol-8-O- $\beta$ -D-glucoside | 4.686 $\pm$ 0.077                   | 0.89                 | 4.611 $\pm$ 0.024                   | 1.54    |
| Emodin-8-O- $\beta$ -D-glucoside       | 3.515 $\pm$ 0.103                   | 1.33                 | 3.529 $\pm$ 0.076                   | 0.45    |
| Physcion-8-O- $\beta$ -D-glucoside     | 2.789 $\pm$ 0.065                   | 1.08                 | 2.752 $\pm$ 0.043                   | 1.64    |
| Aloe-emodin                            | 1.634 $\pm$ 0.097                   | 1.89                 | 1.629 $\pm$ 0.088                   | 1.48    |
| Rhein                                  | 1.758 $\pm$ 0.084                   | 1.92                 | 1.762 $\pm$ 0.091                   | 1.73    |
| Emodin                                 | 2.037 $\pm$ 0.034                   | 2.09                 | 2.052 $\pm$ 0.055                   | 1.81    |
| Chrysophanol                           | 1.184 $\pm$ 0.022                   | 1.95                 | 1.195 $\pm$ 0.076                   | 2.39    |
| Physcion                               | 0.892 $\pm$ 0.022                   | 0.96                 | 0.898 $\pm$ 0.031                   | 0.83    |

<sup>a</sup> RSD(%)=100 $\times$ SD/mean

**Table 2** Recovery of the UPLC analysis (mean  $\pm$  SD, n=6)

| Components                             | Amount detected in sample Rh01 ( $C_{\text{sam}}$ , mg) | Added amount ( $C_{\text{add}}$ , mg) | Amount detected in the mixture of sample Rh01 and added component ( $C_{\text{det}}$ , mg) | Recovery (%)      |
|----------------------------------------|---------------------------------------------------------|---------------------------------------|--------------------------------------------------------------------------------------------|-------------------|
| Aloe-emodin-8-O- $\beta$ -D-glucoside  | 2.211                                                   | 2.235                                 | 4.381 $\pm$ 0.042                                                                          | 97.09 $\pm$ 1.17  |
| Sennoside B                            | 0.633                                                   | 0.624                                 | 1.231 $\pm$ 0.064                                                                          | 94.83 $\pm$ 4.12  |
| Rhein-8-O- $\beta$ -D-glucoside        | 2.568                                                   | 2.544                                 | 5.016 $\pm$ 0.094                                                                          | 96.23 $\pm$ 3.05  |
| Sennoside A                            | 1.622                                                   | 1.618                                 | 3.141 $\pm$ 0.097                                                                          | 93.88 $\pm$ 4.59  |
| Chrysophanol-8-O- $\beta$ -D-glucoside | 2.383                                                   | 2.378                                 | 4.689 $\pm$ 0.102                                                                          | 96.97 $\pm$ 2.98  |
| Emodin-8-O- $\beta$ -D-glucoside       | 1.758                                                   | 1.744                                 | 3.511 $\pm$ 0.089                                                                          | 100.52 $\pm$ 3.57 |
| Physcion-8-O- $\beta$ -D-glucoside     | 1.395                                                   | 1.385                                 | 2.762 $\pm$ 0.015                                                                          | 98.70 $\pm$ 2.59  |
| Aloe-emodin                            | 0.817                                                   | 0.822                                 | 1.631 $\pm$ 0.037                                                                          | 99.03 $\pm$ 2.76  |
| Rhein                                  | 0.879                                                   | 0.886                                 | 1.761 $\pm$ 0.083                                                                          | 99.55 $\pm$ 1.37  |
| Emodin                                 | 1.019                                                   | 1.028                                 | 2.055 $\pm$ 0.084                                                                          | 100.78 $\pm$ 3.19 |
| Chrysophanol                           | 0.592                                                   | 0.601                                 | 1.199 $\pm$ 0.027                                                                          | 100.74 $\pm$ 1.97 |
| Physcion                               | 0.446                                                   | 0.452                                 | 0.905 $\pm$ 0.046                                                                          | 101.55 $\pm$ 3.25 |

**Table 3** Analyzing results of 24 samples by QAMS (mg/g, mean, n = 3)

| <b>Samples</b> | <b>(1)</b> | <b>(11)</b> | <b>(2)</b> | <b>(12)</b> | <b>(3)</b> | <b>(4)</b> | <b>(5)</b> | <b>(6)</b> | <b>(7)</b> | <b>(8)</b> | <b>(9)</b> | <b>(10)</b> |
|----------------|------------|-------------|------------|-------------|------------|------------|------------|------------|------------|------------|------------|-------------|
| Rh01           | 4.418      | 0.603       | 5.142      | 1.117       | 4.677      | 3.508      | 2.767      | 1.631      | 1.746      | 1.188      | 2.037      | 0.899       |
| Rh02           | 4.921      | 0.769       | 4.592      | 0.931       | 3.992      | 3.201      | 1.929      | 1.927      | 1.433      | 1.351      | 1.874      | 1.247       |
| Rh03           | 5.019      | 0.937       | 4.367      | 0.808       | 4.033      | 2.912      | 2.416      | 1.344      | 1.821      | 1.837      | 1.945      | 1.349       |
| Rh04           | 5.366      | 0.533       | 4.602      | 1.215       | 4.617      | 3.229      | 2.817      | 1.568      | 1.698      | 1.012      | 1.768      | 1.068       |
| Rh05           | 4.619      | 0.826       | 3.887      | 1.443       | 3.771      | 2.307      | 2.462      | 1.378      | 1.422      | 1.449      | 1.533      | 0.774       |
| Rh06           | 4.037      | 0.718       | 4.764      | 1.196       | 2.832      | 3.485      | 1.897      | 1.802      | 1.383      | 0.975      | 2.004      | 1.325       |
| Rh07           | 3.823      | 0.905       | 3.416      | 1.735       | 4.011      | 4.255      | 2.404      | 1.113      | 1.006      | 1.403      | 1.707      | 0.741       |
| Rh08           | 5.108      | 0.832       | 4.029      | 1.656       | 3.846      | 3.374      | 2.571      | 1.209      | 0.784      | 1.128      | 1.363      | 0.998       |
| Rh09           | 1.238      | 0           | 1.337      | 0.241       | 2.661      | 1.325      | 1.012      | 2.987      | 2.353      | 1.903      | 2.723      | 1.722       |
| Rh10           | 1.104      | 0.203       | 1.215      | 0.129       | 1.133      | 1.867      | 0.901      | 2.889      | 3.014      | 3.019      | 2.606      | 1.837       |
| Rh11           | 0.112      | 0.284       | 0.673      | 0.108       | 1.008      | 1.258      | 0.317      | 1.926      | 2.483      | 2.883      | 1.681      | 1.949       |
| Rh12           | 0.674      | 0           | 1.307      | 0           | 1.325      | 0.819      | 0.703      | 2.034      | 2.059      | 2.776      | 1.489      | 1.631       |
| Rh13           | 0.962      | 0.102       | 1.433      | 0.073       | 1.748      | 0.991      | 0.481      | 1.741      | 1.994      | 2.193      | 2.034      | 1.574       |
| Rh14           | 0.896      | 0.199       | 0.665      | 0.191       | 0.972      | 1.205      | 0.117      | 2.109      | 2.765      | 1.764      | 1.738      | 1.688       |
| Rh15           | 1.022      | 0.028       | 0.843      | 0.087       | 1.034      | 0.502      | 0.899      | 2.337      | 2.303      | 2.655      | 1.804      | 1.912       |
| Rh16           | 1.334      | 0           | 0.976      | 0.105       | 2.187      | 0.643      | 0.476      | 1.191      | 1.492      | 1.908      | 2.209      | 1.303       |
| Rh17           | 2.695      | 0.112       | 2.954      | 0.415       | 3.017      | 2.443      | 1.712      | 1.845      | 1.917      | 2.364      | 2.824      | 1.014       |
| Rh18           | 3.417      | 0.208       | 2.695      | 0.727       | 1.803      | 2.023      | 1.388      | 2.176      | 2.433      | 2.037      | 3.019      | 1.472       |
| Rh19           | 2.709      | 0           | 2.527      | 0.088       | 2.066      | 2.168      | 1.629      | 1.703      | 2.082      | 1.883      | 2.346      | 1.077       |
| Rh20           | 1.673      | 0.189       | 1.981      | 0.572       | 1.605      | 1.714      | 1.002      | 2.034      | 1.499      | 2.459      | 1.746      | 1.402       |
| Rh21           | 1.988      | 0.409       | 1.735      | 0.194       | 2.179      | 1.809      | 1.149      | 1.309      | 2.327      | 2.618      | 1.858      | 0.978       |
| Rh22           | 2.314      | 0.388       | 2.067      | 0.449       | 1.901      | 0.781      | 1.302      | 1.573      | 2.402      | 1.764      | 2.559      | 2.013       |
| Rh23           | 2.479      | 0.297       | 0.762      | 0.091       | 0.886      | 1.014      | 0.823      | 0.964      | 1.624      | 2.393      | 1.473      | 1.643       |
| Rh24           | 3.006      | 0.443       | 1.659      | 0.103       | 1.006      | 1.447      | 0.764      | 1.742      | 1.738      | 2.405      | 2.544      | 1.589       |

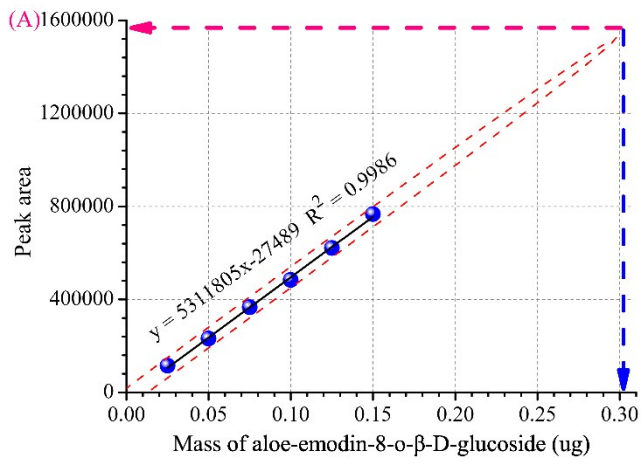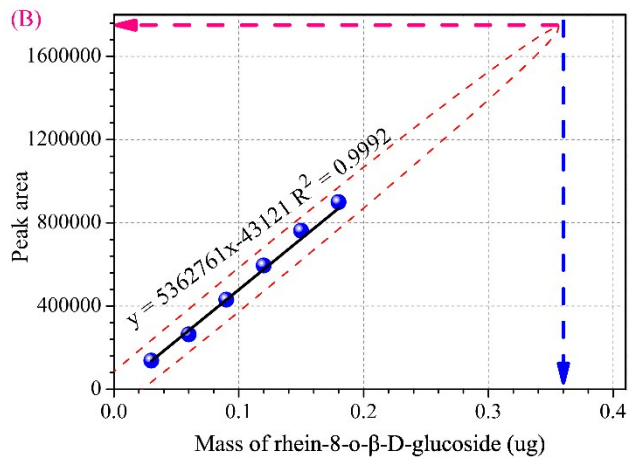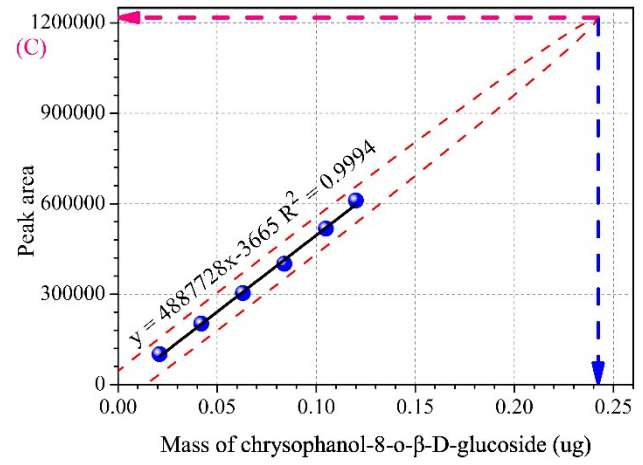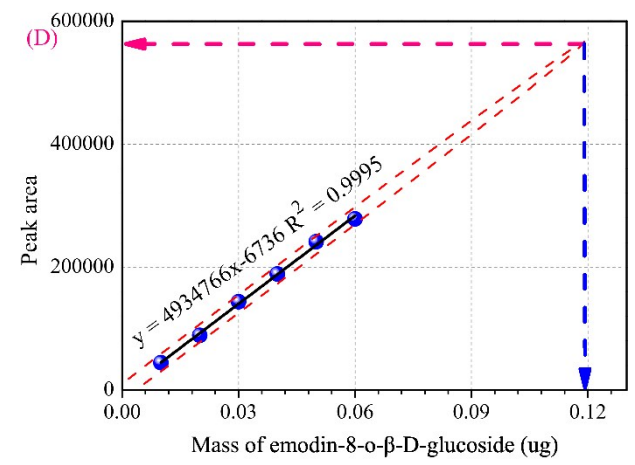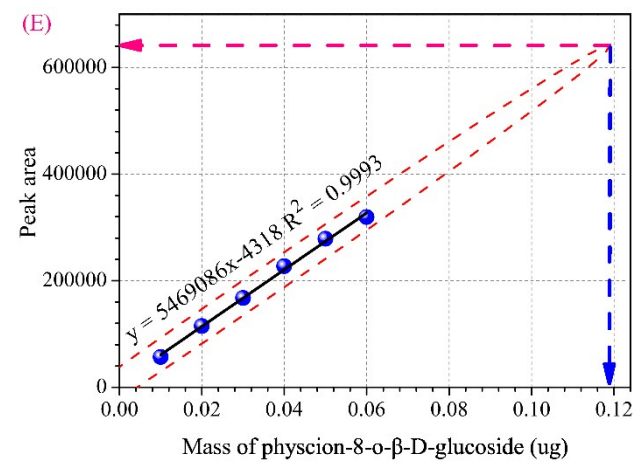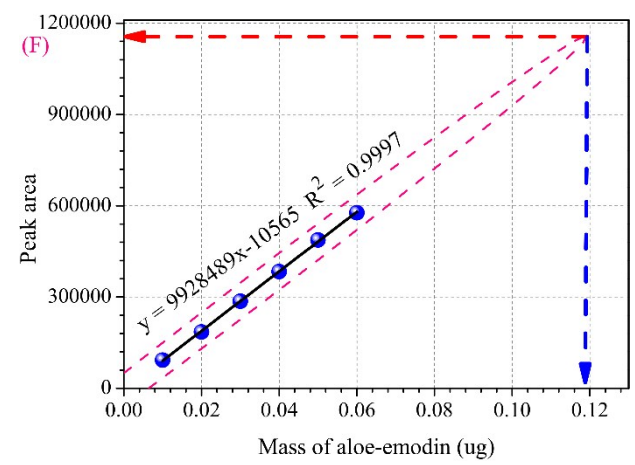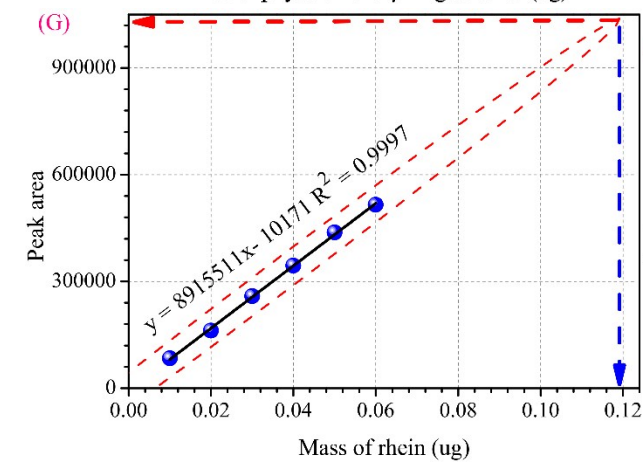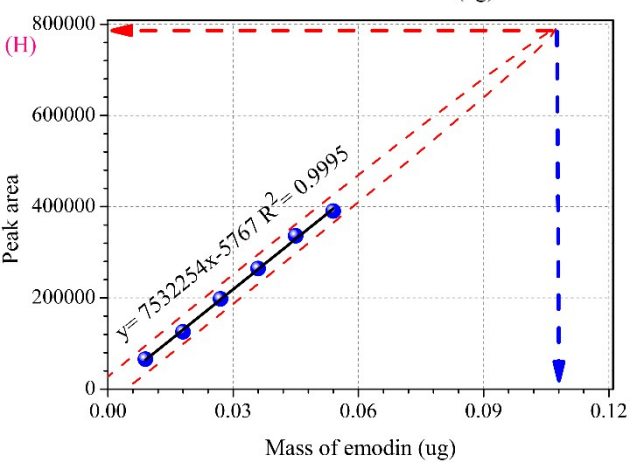

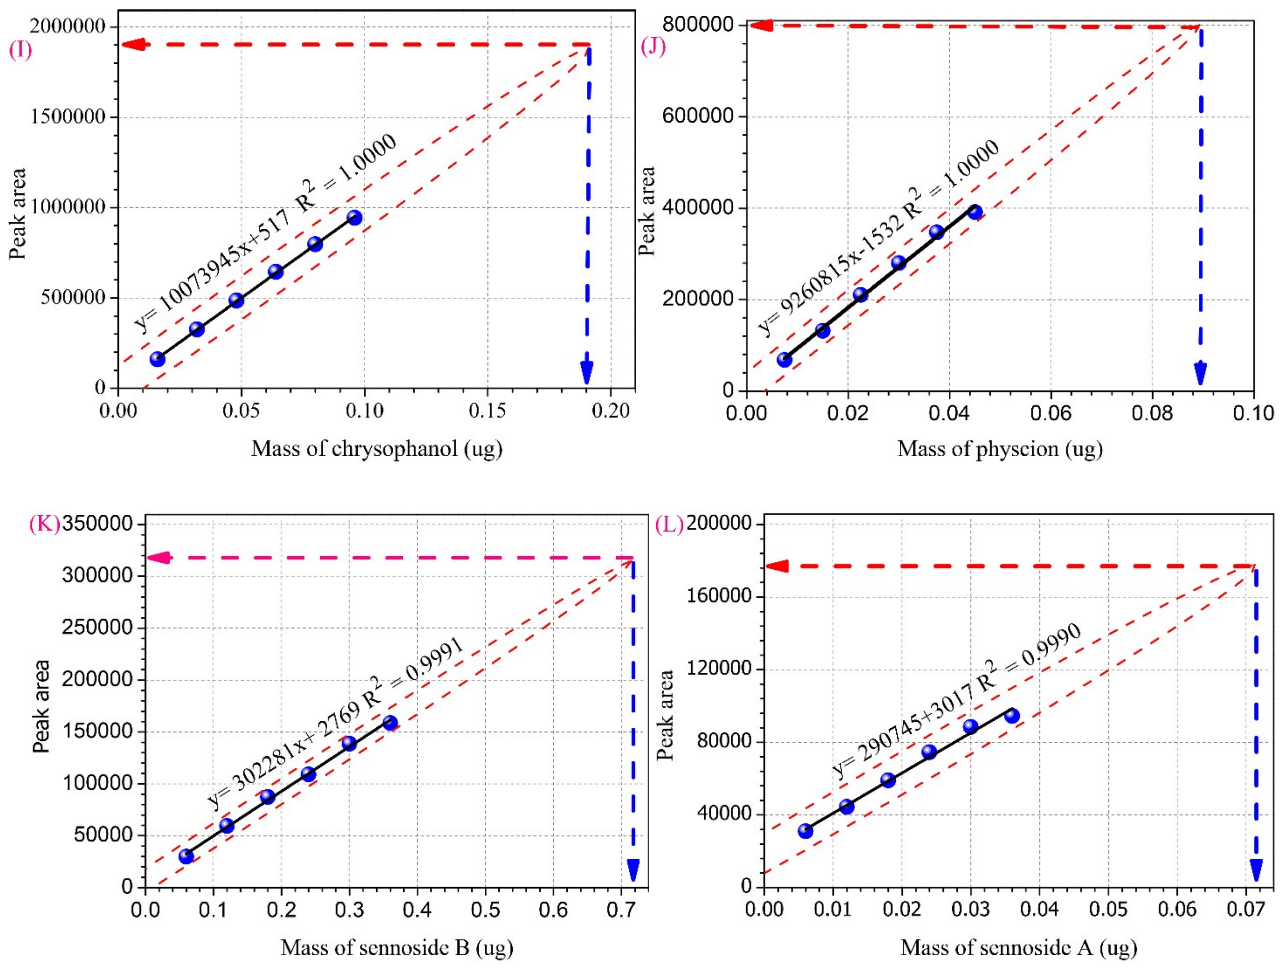

**Figure 1.** The linear relationship between the concentration of each analyte anthraquinone derivative UPLC injection and peak area, the red dotted line represent the 95% confidence ellipses of each component.
